# Supplementary material for: Oxygen Vacancy-Mediated Activates Oxygen to Produce Reactive Oxygen Species (ROS) on Ce-Modified Activated Clay for Degradation of Organic Compounds without Hydrogen Peroxide in Strong Acid
Source: MDPI journal article supplement (doi:10.3390/nano12244410), 2022-12-10
Supplement: s1 [file s1]

Supplementary Material

# Oxygen Vacancy-Mediated Activates Oxygen to Produce Reactive Oxygen Species (ROS) on Ce-Modified Activated Clay for Degradation of Organic Compounds without Hydrogen Peroxide in Strong Acid

Tianming Wu <sup>1</sup>, Jing Cui <sup>2</sup>, Changjiang Wang <sup>3</sup>, Gong Zhang <sup>4</sup>, Limin Li <sup>1</sup>, Yue Qu <sup>1</sup> and Yusheng Niu <sup>1,5,\*</sup>

<sup>1</sup> Institute of Biomedical Engineering, College of Life Sciences, Qingdao University, Qingdao 266071, China

<sup>2</sup> College of Resources and Environment, Shandong Agricultural University, Taian 271018, China

<sup>3</sup> Shandong Zhengyuan Geological Resource Exploration Co. Ltd., China Metallurgical Geology Bureau, Weifang 261200, China

<sup>4</sup> Center for Water and Ecology, State Key Joint Laboratory of Environment Simulation and Pollution Control, School of Environment, Tsinghua University, Beijing 100084, China

<sup>5</sup> School of Tourism and Geography Science, Qingdao University, Qingdao 266071, China

\* Correspondence: nys@qdu.edu.cn; Tel.: +86-532-85955399

**Supplementary Figures**

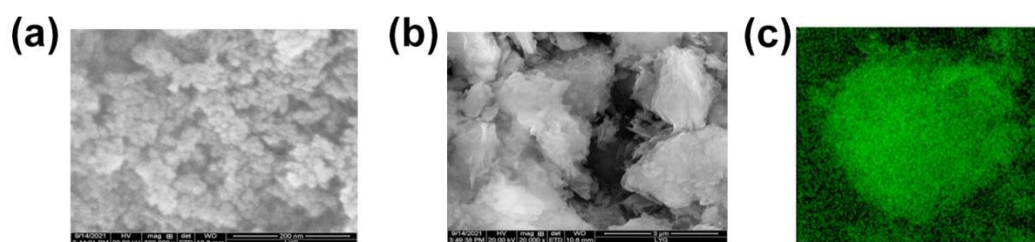

**Figure S1.** SEM images of CeO<sub>2</sub> (a) , Acid treated clay (b). EDS compositional mapping of O (c).

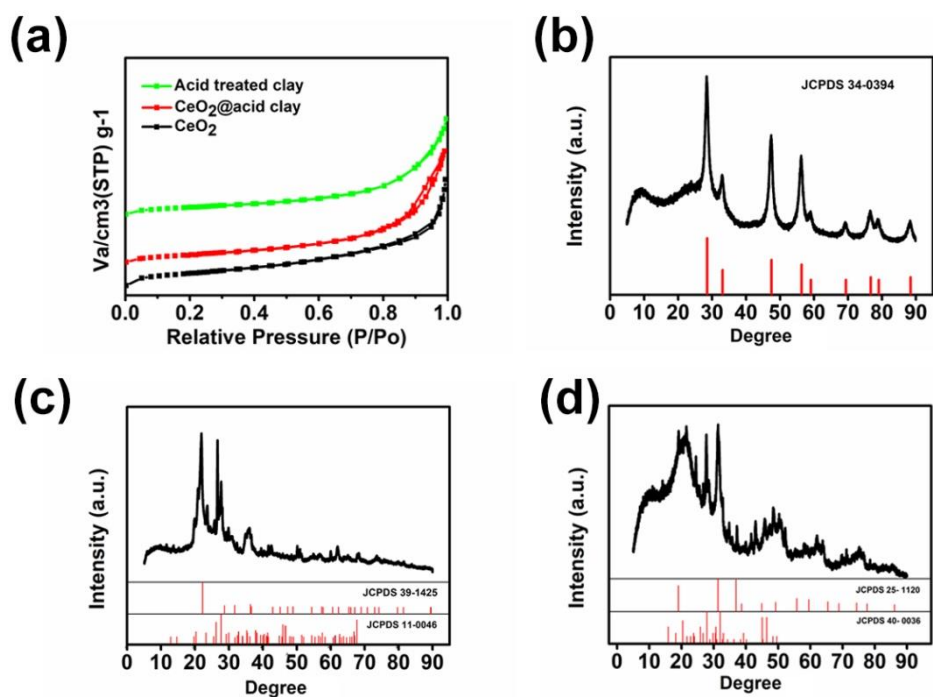

**Figure S2.** N<sub>2</sub> adsorption/desorption isotherms of CeO<sub>2</sub>, acid treated clay and CeO<sub>2</sub>@acid clay (a). XRD patterns of the CeO<sub>2</sub> (b), Acid treated clay (c) and CeAY(d).

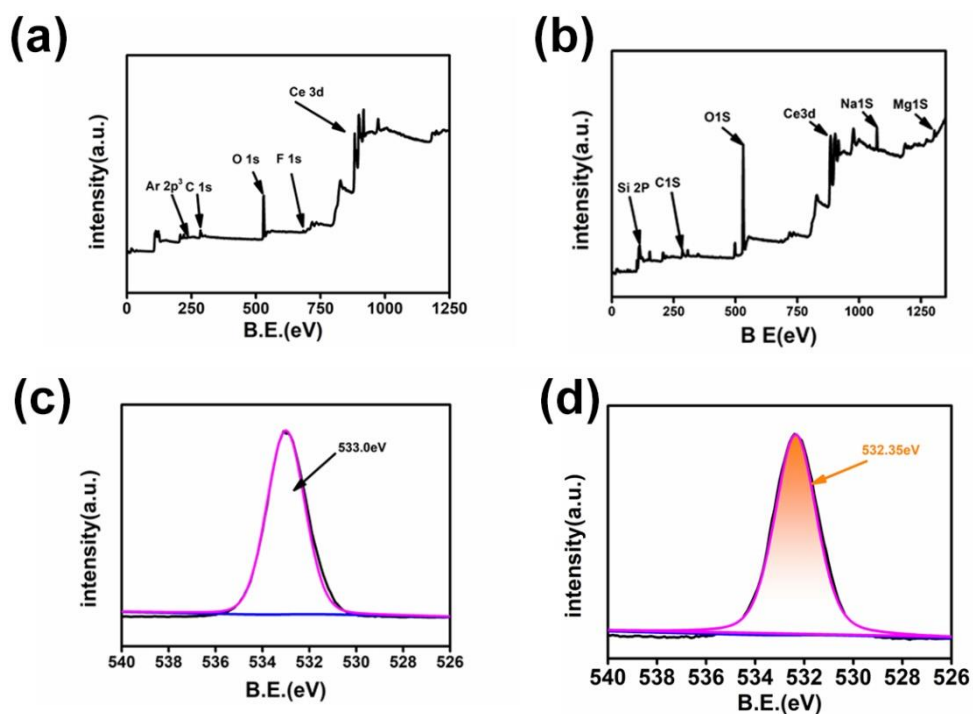

**Figure S3.** The XPS survey spectrum of CeO<sub>2</sub> (a) and CeO<sub>2</sub>@acid clay (b). The O1s of Acid treated clay (c). The O1s XPS patterns of CeAY after degradation of MO (d).

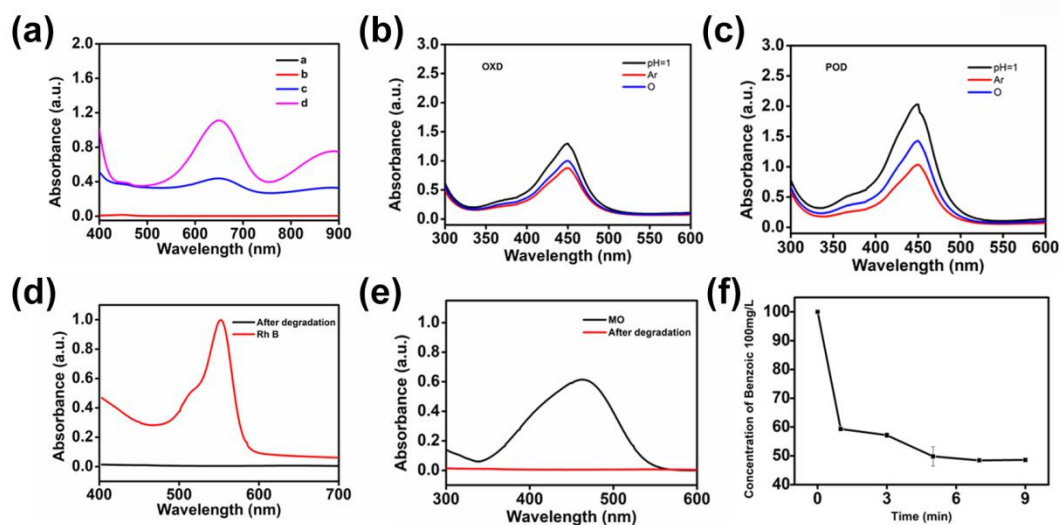

**Figure S4.** The catalyze activity of the CeO<sub>2</sub>, a)TMB; b)TMB + H<sub>2</sub>O<sub>2</sub>; c)CeO<sub>2</sub> + TMB; d)CeO<sub>2</sub> + TMB + H<sub>2</sub>O<sub>2</sub> (a). The effort of the oxygen, argon to the catalyze activity of CeAY (b,c). The degradation result of Rh B, MO and Benzoic acid (CeAY 2 mg mL<sup>-1</sup>, room temperature pH = 1, 5 mg L<sup>-1</sup>) (d–f).

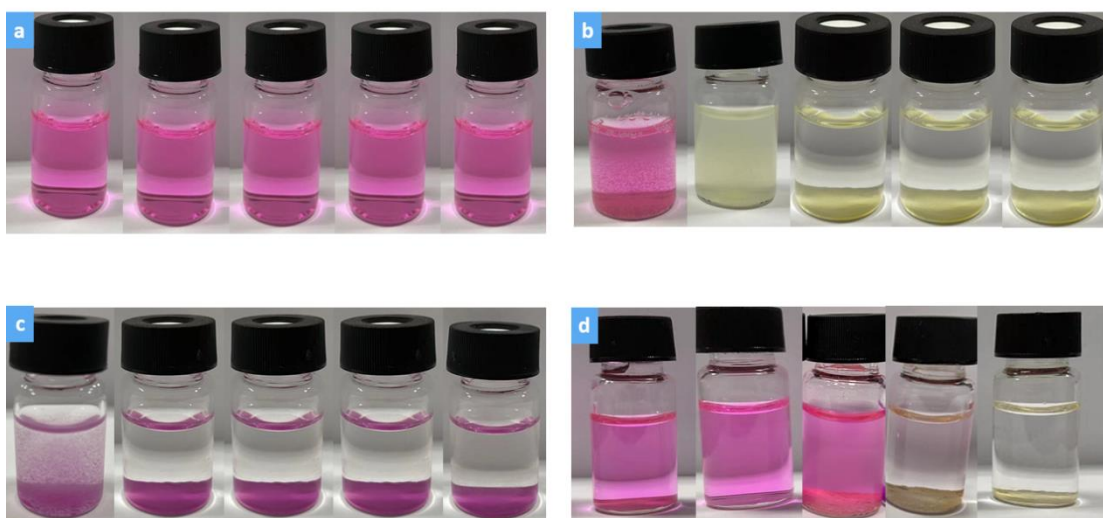

**Figure S5.** The degradation effect of the Rh B with time increased (a, pH = 7.0, after adding the CeO<sub>2</sub> and CeAY; b, pH = 1.0, after adding the CeAY; c, the acid-treated clay adsorbs Rh B to the bottom of the solution; d, pH = 1.0, after adding the CeO<sub>2</sub> for two weeks).

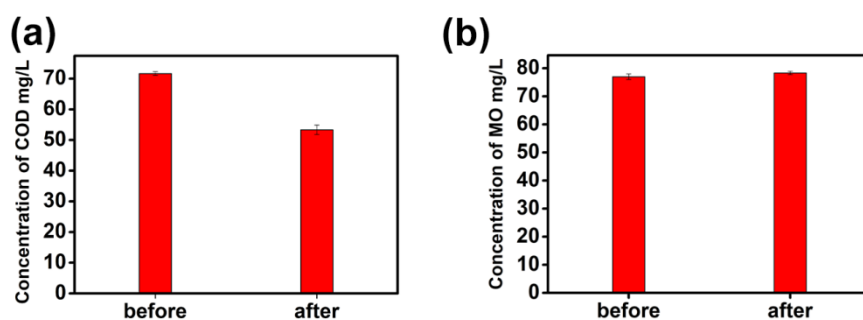

Figure S6. The Concentration of COD before and after degradation (a, Rh B; b, MO).

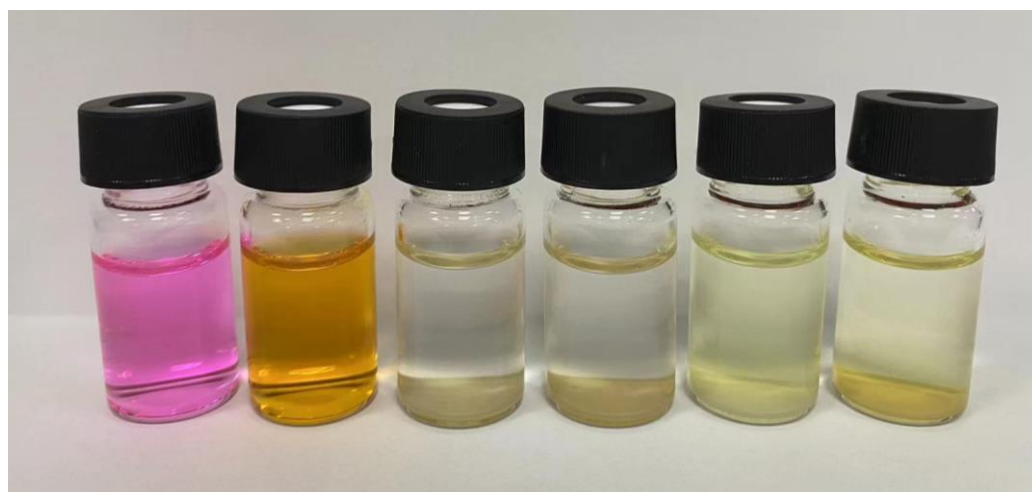

Figure S7. The degradation effect of Rh B and MO at different pH and different strong acid.

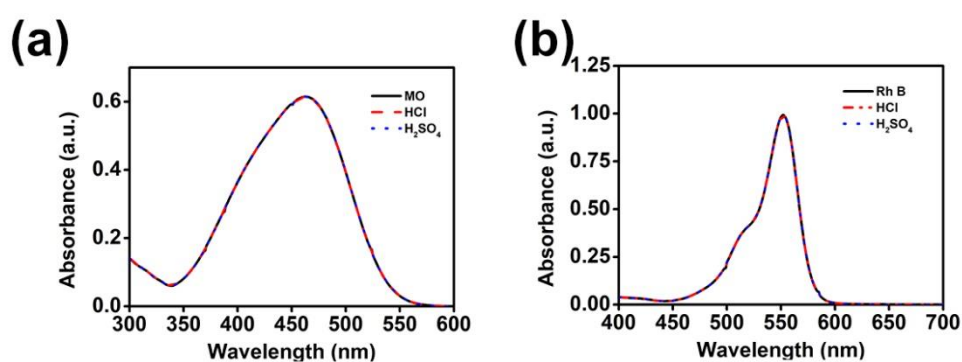

Figure S8. The effect of add HCl and H<sub>2</sub>SO<sub>4</sub> on the degradation of Mo and Rh B (a, MO; b, Rh B).

## Supplementary Tables

Table S1. The main components of bentonite.

| component | SiO <sub>2</sub> | Al <sub>2</sub> O <sub>3</sub> | Fe <sub>2</sub> O <sub>3</sub> | FeO  | TiO  | CaO  | MgO  | MnO  | K <sub>2</sub> O | Na <sub>2</sub> O | P <sub>2</sub> O <sub>5</sub> |
|-----------|------------------|--------------------------------|--------------------------------|------|------|------|------|------|------------------|-------------------|-------------------------------|
| content   | 61.74            | 16.08                          | 3.19                           | 0.27 | 0.15 | 5.01 | 3.19 | 0.29 | 1.00             | 0.22              | 0.03                          |

**Table S2.** The specific surface area of different materials.

| Sample                      | Surface area(m <sup>2</sup> g <sup>-1</sup> ) |
|-----------------------------|-----------------------------------------------|
| CeO <sub>2</sub>            | 2.6143                                        |
| Acid treated clay           | 68.641                                        |
| CeO <sub>2</sub> @acid clay | 94.463                                        |

**Table S3.** The Michaelis-Menten constant (K<sub>m</sub>) and maximum reaction rate (V<sub>max</sub>) of the as-obtained CeAY with TMB as the substrate.

| Catalyst         | Substance | K <sub>m</sub> (mM) | V <sub>max</sub> (10 <sup>-7</sup> M/s) | References |
|------------------|-----------|---------------------|-----------------------------------------|------------|
| CeAY             | TMB       | 0.3412              | 0.0127                                  | This work  |
| CeO <sub>2</sub> | TMB       | 1.5                 | 0.69                                    | [1]        |
| isPNC            | TMB       | 3.8                 | 7                                       | [2]        |
| swPNC            | TMB       | 1.9                 | 6                                       | [2]        |
| isDNC            | TMB       | 1.8                 | 5                                       | [2]        |
| swDNC            | TMB       | 0.8                 | 3                                       | [2]        |
| HRP              | TMB       | 0.43                | 1                                       | [3]        |
| Cu-Cys@COF-OM    | TMB       | 0.75                | 1.01                                    | [4]        |
| e                | TMB       | 0.58                | 4.56                                    | [5]        |
| CH-Cu            |           |                     |                                         |            |

**Table S4.** Degradation intermediates of RhB in the CeAY system.

| Relative molecular mass | Structure                                                                            |
|-------------------------|--------------------------------------------------------------------------------------|
| 165                     | 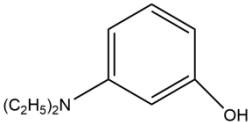 |
| 148                     |  |
| 230                     |  |
| 110                     |  |
| 218                     |  |

|     |                                                                                    |
|-----|------------------------------------------------------------------------------------|
| 154 | 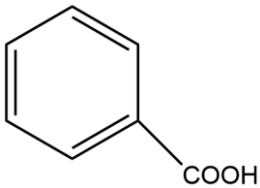 |
| 196 |  |
| 168 |  |
| 154 |  |
| 46  |   |

**Table S5.** Degradation intermediates of RhB in the CeAY system.

| Relative molecular mass | Structure                                                                            |
|-------------------------|--------------------------------------------------------------------------------------|
| 304                     | 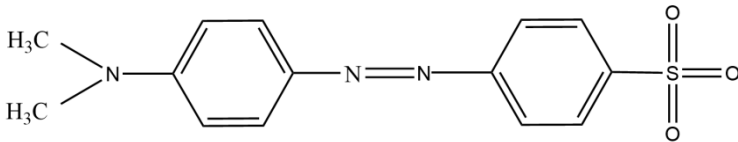 |
| 306                     |  |
| 184                     |  |
| 157                     |  |
| 142                     |  |

|     |                                                                                      |
|-----|--------------------------------------------------------------------------------------|
| 121 | 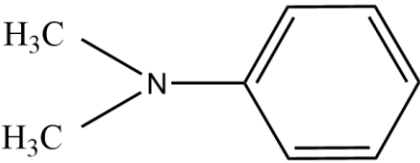   |
| 108 |    |
| 107 |    |
| 102 |   |
| 82  |  |

[1] B. Liu, Z. Huang, J. Liu, Boosting the oxidase mimicking activity of nanoceria by fluoride capping: rivaling protein enzymes and ultrasensitive F(-) detection, *Nanoscale*, 8 (2016) 13562-13567.

[2] A. Asati, S. Santra, C. Kaitanis, S. Nath, J.M. Perez, Oxidase-like activity of polymer-coated cerium oxide nanoparticles, *Angew Chem Int Ed Engl*, 48 (2009) 2308-2312.

[3] L. Gao, J. Zhuang, L. Nie, J. Zhang, Y. Zhang, N. Gu, T. Wang, J. Feng, D. Yang, S. Perrett, X. Yan, Intrinsic peroxidase-like activity of ferromagnetic nanoparticles, *Nature Nanotechnology*, 2 (2007) 577-583.

[4] Y. Tang, S. Jiang, W. Li, S. Jalil Shah, Z. Zhao, L. Pan, Z. Zhao, Confined construction of COF@Cu-nanozyme with high activity and stability as laccase biomimetic catalyst for the efficient degradation of phenolic pollutants, *Chemical Engineering Journal*, 448 (2022).

[5] J. Wang, R. Huang, W. Qi, R. Su, B.P. Binks, Z. He, Construction of a bioinspired laccase-mimicking nanozyme for the degradation and detection of phenolic pollutants, *Applied Catalysis B: Environmental*, 254 (2019) 452-462.
